# Supplementary material
Source: PubMed Central journal article supplement (PMC8193405)
Supplement: 12250_2016_3727_MOESM1_ESM.pdf [file 12250_2016_3727_MOESM1_ESM.pdf]

## Electronic Supplementary Material

### Detection and characterization of diverse alpha and betacoronaviruses from bats in China

Lin Xu<sup>1#</sup>, Fuqiang Zhang<sup>2#</sup>, Weihong Yang<sup>3#</sup>, Tinglei Jiang<sup>4#</sup>, Guanjun Lu<sup>4</sup>, Biao He<sup>1</sup>, Xingyu Li<sup>1</sup>, Tingsong Hu<sup>2</sup>, Gang Chen<sup>2</sup>, Yun Feng<sup>3</sup>, Yuzhen Zhang<sup>3</sup>, Quanshui Fan<sup>2</sup>, Jiang Feng<sup>4</sup>, Hailin Zhang<sup>3</sup>, Changchun Tu<sup>1,5✉</sup>

1. Military Veterinary Institute, Academy of Military Medical Sciences, Changchun 130122, China
2. Center for Disease Control and Prevention of Chengdu Military Region, Kunming 650118, China
3. Yunnan Institute of Endemic Diseases Control and Prevention, Dali 671000, China
4. School of Urban and Environmental Sciences, Northeast Normal University, Changchun 130024, China
5. Jiangsu Co-innovation Center for Prevention and Control of Important Animal Infectious Diseases and Zoonoses, Yangzhou 225009, China

Supporting information to DOI: 10.1007/s12250-016-3727-3

Table S1. Primers used in this study.

| Primers                               | Position of first nucleotide (nt) | Sequences (5'–3')          |
|---------------------------------------|-----------------------------------|----------------------------|
| <b>Pan-coronavirus nested primers</b> |                                   |                            |
| CoVOF                                 | 14615                             | ATGGGWTGGGAYTAYCCIAARTG    |
| CoVOR                                 | 15200                             | TGYTGIGARCAAAAYTCRTG       |
| CoVF                                  | 14618                             | GGITGGGAYTAYCCIAARTGYGA    |
| CoVR                                  | 15035                             | CCRTCATCWGAIARWATCATCAT    |
| <b>JTMC15</b>                         |                                   |                            |
| F3                                    | 2811                              | GCGTGTAGAYAARGTGCTTAA      |
| R3                                    | 4799                              | CCACGCTTRAGAAATTCOA        |
| F4                                    | 4648                              | GTKTCAGTDTCWTCACCAGA       |
| R4                                    | 6919                              | AATRCTTAACAAYAAYAGCCACAT   |
| F5                                    | 6806                              | CACTWCCTACRACTATWGCTAAAAAT |
| R5                                    | 8939                              | GCAGARGTRGMAAARTCACTATACT  |
| F6                                    | 8827                              | CCTGGHTTACCDGGTACTGT       |
| R6                                    | 11329                             | CGYCTAGCAGCATCATCATA       |
| F10                                   | 17350                             | TGAGTGTGTCAATGCTAGAC       |
| R10                                   | 19665                             | CTACYTTDGTGTAACAGCATTATT   |
| F12                                   | 21283                             | GCTATACCATGCATGCTAACT      |
| R12                                   | 22615                             | CGAAAAAGARGTTGAGTTGTAG     |
| 5'OR                                  | 252                               | ATTGGCTGAAACGACACCACTTC    |
| 5'IR                                  | 161                               | GTCGATTAAGCACTTGGCTCCA     |
| 3'OF                                  | 27341                             | GACATCCCAGAGTGGAGGAG       |
| 3'IF                                  | 27448                             | AGGTGTTGATGCCTCAGGCTAT     |
| <b>JPDB144</b>                        |                                   |                            |
| F1                                    | 1                                 | GATTTAAGWGAATAGCYTRGCTATC  |
| R1                                    | 1749                              | GTVGTWCCAGAVAGWARTGC       |
| F2                                    | 1572                              | GGTACTATGYACTTTRTKCCT      |
| R2                                    | 3846                              | CWGCDATRCCACCRCCAT         |
| F3                                    | 3759                              | GTKACHHTAGTHTTWGGTGA       |
| R3                                    | 5978                              | ACTAATAGYATCACYGCCA        |
| F4                                    | 5940                              | TAYWCTAATAGYTGCCCTTG       |
| R4                                    | 8244                              | ACATCAGAYTCCACACC          |
| F5                                    | 796                               | TGGCCAGGAAARTTTAGC         |
| R5                                    | 10071                             | TCACTACCAGTYTCRGTGTA       |
| F6                                    | 9854                              | TACTGATGGTAARCTKAATTGTAG   |
| R6                                    | 12438                             | CATAGTTTGCATAGCACT         |
| F7                                    | 12559                             | TCWATGTATAAGCAAGCACGT      |
| R7                                    | 14645                             | GGATCWGCKGCATACATCAT       |
| F8                                    | 14556                             | TATCTTGTGGTTATCACTAC       |
| R8                                    | 17048                             | ATACCTCTCTTGATTAC          |
| F9                                    | 16931                             | CGYATWGAYTATAGTGATGCTG     |
| R9                                    | 18983                             | ATCCCAMTCMACACGTTCC        |

To be continued

| Primers      | Position of first nucleotide (nt) | Sequences (5'-3')            |
|--------------|-----------------------------------|------------------------------|
| F10          | 18791                             | TATGCCTGCTGGASTCATT          |
| R10          | 20854                             | ATACTGRCACAATTGCATATATT      |
| F11          | 20639                             | CCTATTGAYTTAACWATGATTG       |
| R11          | 22365                             | GARWAGAGRTGAACRCCTTG         |
| F12          | 22338                             | GAGTGGTTYGGYATTACMCA         |
| R12          | 24688                             | GAAATAGCACCRAAAGTRTTAG       |
| F13          | 24267                             | GCWGATCCYGGYTATATGC          |
| R13          | 26250                             | CATAACGRRTTKGYCCGAAG         |
| F14          | 26140                             | ACTAAAGYATYAGCAAAACAAGA      |
| R14          | 27969                             | CGTTAAACCCASTCSTCAG          |
| F15          | 27842                             | GCTAYTMGATTATGTGTGC          |
| R15          | 30232                             | GCCTAATCTAATTGAATAATAGC      |
| 5'OR         | 268                               | GTCACACTAGCCTTGGAAGCA        |
| 5'IR         | 83                                | CAGACCACAACACAACACGCACACAACA |
| 3'OF         | 30061                             | ATCATGTTARACTTACAGTGCAAG     |
| 3'IF         | 30151                             | AAAGACTGTCACCTCTGCGTGATT     |
| <b>JTAC2</b> |                                   |                              |
| F1           | 4010                              | CCACTATGTSACCAATWTYTATGAT    |
| R1           | 6107                              | CTTATCAATAAGCTTAGTAGCGTCT    |
| F2           | 5961                              | TGTYGGMCAYTATACTGTTTTTGA     |
| R2           | 8460                              | ACACGGCAATARGTCATAGC         |
| F3           | 8172                              | TGGTAAAACWCTTGTKTTTGC        |
| R3           | 9704                              | ACAAGCGCCATTAATGAA           |
| F4           | 9615                              | TTAAYATTYTGGCRTGCTATGAT      |
| R4           | 11457                             | CYTGTTTCMGCCATTCTATCAA       |
| F5           | 11364                             | GTTCTCCACCTCAGTTGGT          |
| R5           | 13349                             | TCCTCACCAAAWATACACTCTT       |
| F6           | 13199                             | GATAAYCAGGATCTTAATGGTGA      |
| R6           | 15458                             | TGACATGRTCATAAGCRCCTT        |
| F7           | 15309                             | ATTCWACTGCTAARTTTTGGGA       |
| R7           | 17318                             | CCATAAASGAKATWACATGCTCATA    |
| F8           | 17174                             | GAKGGTTGYGGTCTYTTTAAAG       |
| R8           | 18608                             | GGTGTGTARGCATTARCATAGC       |
| F9           | 18470                             | TGCCMTTYTTYTTCTATGATG        |
| R9           | 20451                             | TCRAGCACACTRRTTGTAAGACATAG   |
| F10          | 20301                             | GGACAATGTTYTGTAACAGTG        |
| R10          | 22672                             | ACATTCTTRAAGGCKARCAACTG      |
| F11          | 22567                             | AAYGTGTGCACCCAGTATACTAT      |
| R11          | 24958                             | TGAMGCTTTAAACAGTGCAA         |
| F12          | 24352                             | ATCCCAGAKTATGTYGATGTTAA      |
| R12          | 26127                             | ACCTTATAGCCYTCKACAAGCA       |

| Primers        | Position of first nucleotide (nt) | Sequences (5'-3')         |
|----------------|-----------------------------------|---------------------------|
| F13            | 25921                             | CAGCATCCTTATGGCTTG        |
| R13            | 27429                             | ACTTTGGCACAGTCATYTTATAG   |
| Genome walking |                                   |                           |
| R1             | 4161                              | TGGCTGTAAAGTTGGCTGAGGT    |
| R2             | 4274                              | GCCACCACCATGAGACAAATTCT   |
| R3             | 4368                              | CAGAGCCAACCTTAAGTTTGCCA   |
| R4             | 2642                              | ACTTACARCTAACACCGGCCAGT   |
| R5             | 2745                              | TAGTCAAACCGTTCTCTACWGAAT  |
| R6             | 2889                              | CGTCATAGAATGCATAACCATCAAC |

Table S2. Putative nonstructural proteins (nsps) of ORF1a and ORF1b (replicase) in BatCoV JTAC2, JTMC15 and JPDB144.

| nsp                         | JTAC2 <sup>§</sup> |                                          | JTMC15      |                                          | JPDB144     |                                          |
|-----------------------------|--------------------|------------------------------------------|-------------|------------------------------------------|-------------|------------------------------------------|
|                             | Length (aa)        | First - last residue <sup>Position</sup> | Length (aa) | First - last residue <sup>Position</sup> | Length (aa) | First - last residue <sup>Position</sup> |
| 1                           | -                  | -                                        | 179         | M <sup>1</sup> -G <sup>179</sup>         | 731         | M <sup>1</sup> -G <sup>731</sup>         |
| 2                           | 467                | Y <sup>1</sup> -G <sup>467</sup>         | 639         | G <sup>180</sup> -G <sup>818</sup>       | 489         | R <sup>732</sup> -G <sup>1220</sup>      |
| 3 (ADRP/PL <sup>Pro</sup> ) | 1637               | G <sup>468</sup> -A <sup>2104</sup>      | 1724        | A <sup>819</sup> -G <sup>2542</sup>      | 1572        | G <sup>1221</sup> -A <sup>2792</sup>     |
| 4                           | 480                | G <sup>2105</sup> -Q <sup>2584</sup>     | 500         | K <sup>2543</sup> -Q <sup>3042</sup>     | 512         | T <sup>2793</sup> -Q <sup>3304</sup>     |
| 5 (3CL <sup>Pro</sup> )     | 302                | S <sup>2585</sup> -Q <sup>2886</sup>     | 306         | S <sup>3043</sup> -Q <sup>3348</sup>     | 306         | S <sup>3305</sup> -Q <sup>3610</sup>     |
| 6                           | 276                | S <sup>2887</sup> -Q <sup>3162</sup>     | 290         | G <sup>3349</sup> -Q <sup>3638</sup>     | 292         | S <sup>3611</sup> -Q <sup>3902</sup>     |
| 7                           | 83                 | S <sup>3163</sup> -Q <sup>3245</sup>     | 83          | S <sup>3639</sup> -Q <sup>3721</sup>     | 83          | S <sup>3903</sup> -Q <sup>3985</sup>     |
| 8                           | 195                | T <sup>3246</sup> -Q <sup>3440</sup>     | 198         | A <sup>3722</sup> -Q <sup>3919</sup>     | 199         | A <sup>3986</sup> -Q <sup>4184</sup>     |
| 9                           | 108                | N <sup>3441</sup> -Q <sup>3548</sup>     | 113         | N <sup>3920</sup> -Q <sup>4032</sup>     | 110         | N <sup>4185</sup> -Q <sup>4294</sup>     |
| 10                          | 135                | A <sup>3549</sup> -Q <sup>3683</sup>     | 139         | A <sup>4033</sup> -Q <sup>4171</sup>     | 139         | A <sup>4295</sup> -Q <sup>4433</sup>     |
| 11                          | 17                 | S <sup>3684</sup> -D <sup>3700</sup>     | 13          | S <sup>4172</sup> -V <sup>4184</sup>     | 14          | S <sup>4434</sup> -V <sup>4447</sup>     |
| 12 (RdRP)                   | 927                | S <sup>3684</sup> -Q <sup>4610</sup>     | 932         | S <sup>4172</sup> -Q <sup>5103</sup>     | 934         | S <sup>4434</sup> -Q <sup>5367</sup>     |
| 13 (Hel)                    | 597                | S <sup>4611</sup> -Q <sup>5207</sup>     | 601         | A <sup>5104</sup> -Q <sup>5704</sup>     | 598         | A <sup>5368</sup> -Q <sup>5965</sup>     |
| 14 (ExoN)                   | 517                | A <sup>5208</sup> -Q <sup>5724</sup>     | 527         | A <sup>5705</sup> -Q <sup>6231</sup>     | 523         | S <sup>5966</sup> -Q <sup>6488</sup>     |
| 15 (XendoU)                 | 339                | N <sup>5725</sup> -Q <sup>6063</sup>     | 346         | S <sup>6232</sup> -Q <sup>6577</sup>     | 342         | G <sup>6489</sup> -Q <sup>6830</sup>     |
| 16 (2'-O-MT)                | 301                | S <sup>6064</sup> -K <sup>6364</sup>     | 298         | A <sup>6578</sup> -N <sup>6875</sup>     | 302         | A <sup>6831</sup> -L <sup>7132</sup>     |

Note: <sup>§</sup>The nsp2 of JTAC2 was partial sequence, lacking the 5' terminal.

Table S3. Comparison of ORF amino acid identities of JTAC2 with other three representative *Alphacoronavirus* strains<sup>#</sup>.

| ORF | JTAC2             | Neixiang-14 |            | 512    |            | PEDV   |            |
|-----|-------------------|-------------|------------|--------|------------|--------|------------|
|     | Length            | Length      | % identity | Length | % identity | Length | % identity |
| 1a  | 3700 <sup>§</sup> | 2030        | 87.9       | 4128   | 68.9       | 4117   | 76.4       |
| 1b  | 2680              | 2679        | 92.8       | 2681   | 85.3       | 2680   | 88.8       |
| S   | 1365              | -           | -          | 1371   | 58.6       | 1386   | 57.1       |
| 3a  | 224               | -           | -          | 224    | 56.9       | 224    | 63.1       |
| E   | 76                | -           | -          | 76     | 83.1       | 76     | 83.1       |
| M   | 226               | -           | -          | 227    | 79.7       | 226    | 84.6       |
| N   | 307 <sup>§</sup>  | -           | -          | 394    | 62.6       | 441    | 58.8       |

Note: <sup>#</sup>Abbreviation and accession numbers: Neixiang-14: MIBtCoV Neixiang-14, KF294377; 512: BatCoV/512/2005, NC\_009657; PEDV: PEDV-1C, KM609203. <sup>§</sup>incomplete sequences.

Table S4. Comparison of ORF amino acid identities of JPDB144 with other two representative strains of *Betacoronavirus* lineage 3 (β3)<sup>#</sup>.

| ORF <sup>§</sup> | JPDB144 | HKU4   |            | HKU5   |            | MERS   |            |
|------------------|---------|--------|------------|--------|------------|--------|------------|
|                  | Length  | Length | % identity | Length | % identity | Length | % identity |
| 1a               | 4447    | 4445   | 93.8       | 4481   | 71.1       | 4391   | 64.7       |
| 1b               | 2699    | 2699   | 97.7       | 2715   | 89.4       | 2701   | 87.4       |
| S                | 1352    | 1352   | 94.5       | 1352   | 69.6       | 1353   | 67.1       |
| 3a (3)           | 91      | 91     | 89.3       | 121    | 44.8       | 103    | 46.8       |
| 3b (4a)          | 119     | 119    | 92.5       | 119    | 53.0       | 109    | 38.3       |
| 3c (4b)          | 285     | 285    | 88.8       | 256    | 39.2       | 246    | 27.8       |
| 3d (5)           | 227     | 227    | 93.0       | 223    | 46.6       | 224    | 46.9       |
| E                | 82      | 82     | 98.8       | 82     | 80.7       | 82     | 69.9       |
| M                | 219     | 219    | 97.3       | 220    | 82.3       | 219    | 84.2       |
| N                | 423     | 423    | 97.9       | 427    | 74.4       | 413    | 70.8       |

Note: <sup>#</sup>Abbreviation and accession numbers: HKU4: BatCoV HKU4-4, EF065508; HKU5: BatCoV HKU5-1, EF065509; MERS: MERS-CoV ChinaGD01, KT006149. <sup>§</sup>ORF3a, 3b, 3c, 3d in HKU4 and HKU5 are described in MERS-CoV as ORF3, 4a, 4b and 5 respectively.

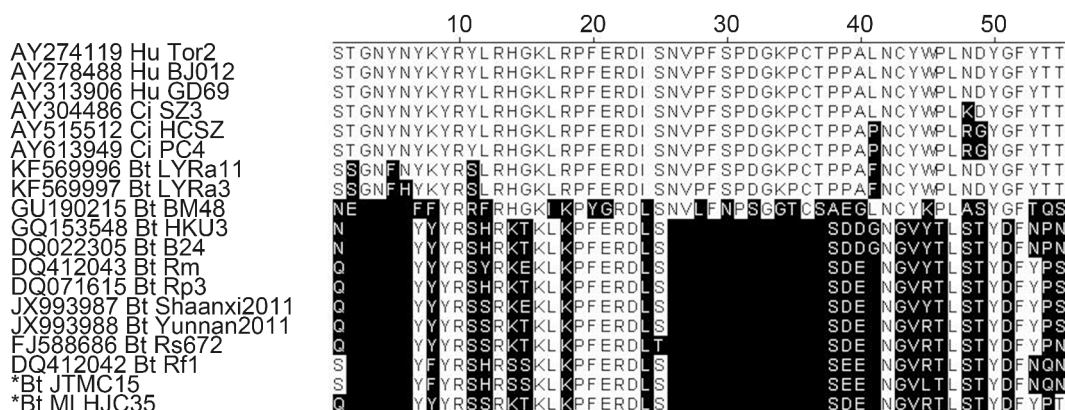

Figure S1. Amino acid sequences comparison of entire RBM of JTMC15, MLHJC35 (marked by asterisks) with other SARS or SARS-related coronaviruses. Middle letters: Hu: human SARS-CoV; Ci: civet SARS-CoV; Bt: Bat SARS-CoV.
